# Supplementary material for: Mechanistic insights into carbon dioxide utilization by superoxide ion generated electrochemically in ionic liquid electrolyte
Source: Royal Society of Chemistry journal article supplement (doi:10.1039/d0cp04903d), 2020-12-10
Supplement: d0cp04903d1.pdf [file d0cp04903d1.pdf]

## Supporting Information

### Mechanistic Insights into Carbon Dioxide Utilization by Superoxide Ion Generated Electrochemically in Ionic Liquid Electrolyte

Ahmed Halilu<sup>a, b</sup>, Maan Hayyan<sup>b, c\*</sup>, Mohamed Kheireddine Aroua<sup>a, d, e\*</sup>, Rozita Yusoff<sup>a\*</sup>, Hanee Farzana<sup>a</sup>

*<sup>a</sup>Department of Chemical Engineering, University of Malaya, Kuala Lumpur  
50603, Malaysia*

*<sup>b</sup>University of Malaya Centre for Ionic Liquids (UMCiL), University of Malaya,  
Kuala Lumpur 50603, Malaysia*

*<sup>c</sup>Chemical Engineering Program, Faculty of Engineering and Technology, Muscat University,  
P.O. Box 550, Muscat, P.C. 130, Oman*

*<sup>d</sup>Centre for Carbon Dioxide Capture and Utilization (CCDCU), School of Science and  
Technology, Sunway University, Bandar Sunway, 47500 Petaling Jaya, Malaysia*

*<sup>e</sup>Department of Engineering, Lancaster University, Lancaster, LA1 4YW, UK*

Email Addresses: maan\_hayyan@yahoo.com (M. Hayyan); kheireddinea@sunway.edu.my  
(M.K. Aroua); ryusoff@um.edu.my (R. Yusoff)

Table S1: Evidence of irreversibility of  $O_2^{\bullet -}/O_2$  using peak separation  $E_p^c$  and  $E_{p/2}^c$ .

| ILs                                      | $ E_p^c - E_{p/2}^c $ |         |         |         |          |          |
|------------------------------------------|-----------------------|---------|---------|---------|----------|----------|
|                                          | 9 mV/s                | 36 mV/s | 64 mV/s | 81 mV/s | 100 mV/s | 144 mV/s |
| [BMAm <sup>+</sup> ][TFSI <sup>-</sup> ] | 89.100                | 101.400 | 83.400  | 85.400  | 87.500   | 85.400   |
| [EMIm <sup>+</sup> ][TFSI <sup>-</sup> ] | 138.900               | 135.900 | 104.500 | 97.000  | 95.600   | 92.400   |

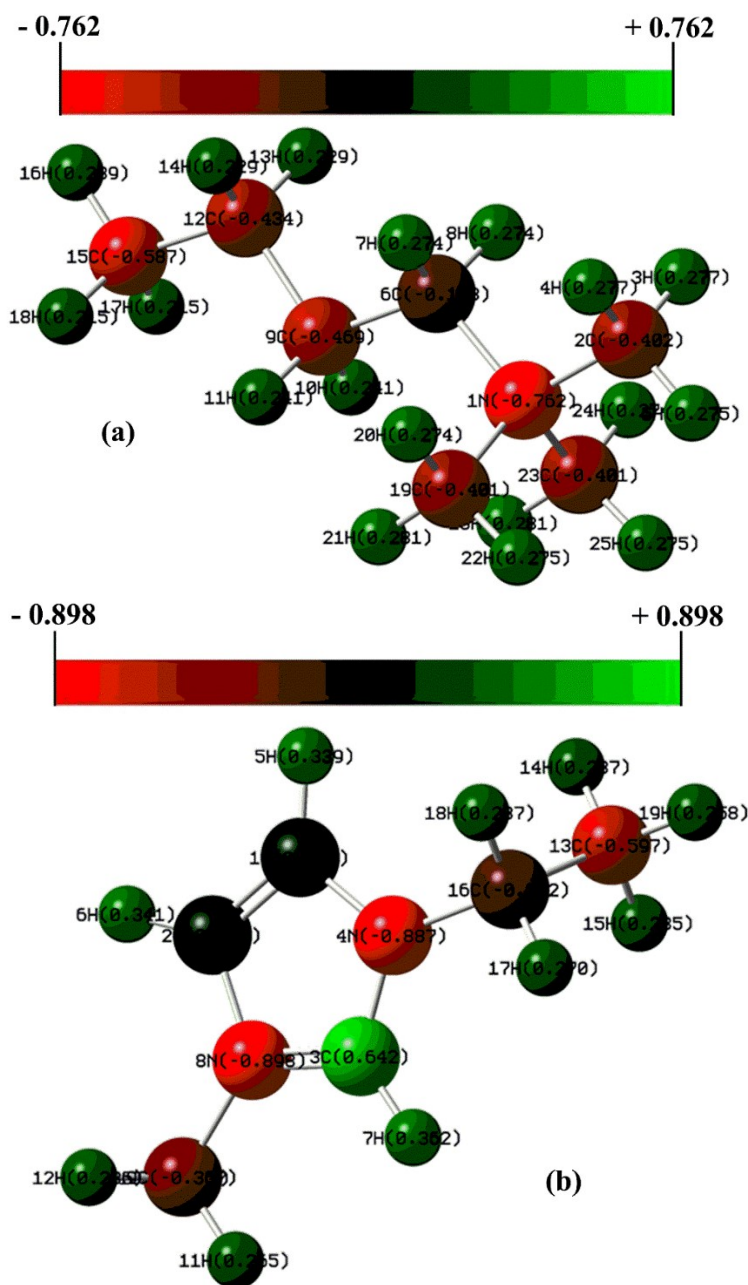

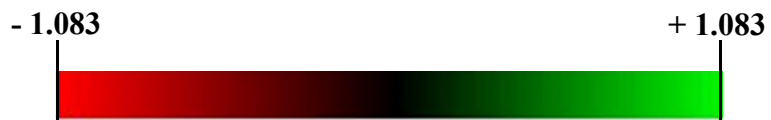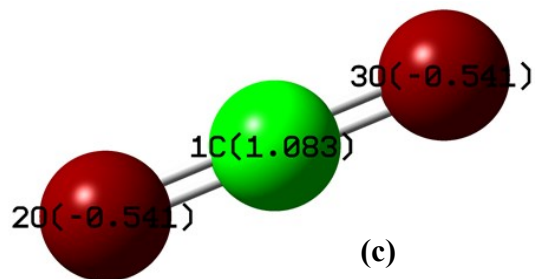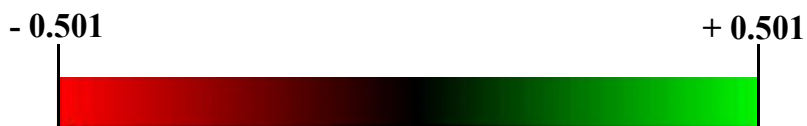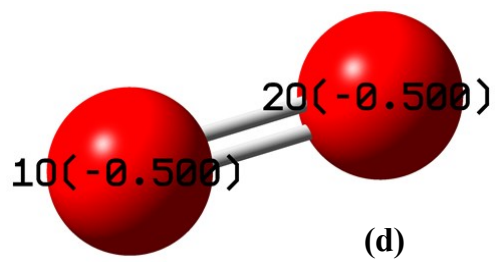

Figure S1: Mulliken atomic charges for (a) [BMAm<sup>+</sup>], (b) [EMIm<sup>+</sup>], (c) CO<sub>2</sub> and (d) O<sub>2</sub><sup>•-</sup> at Hartree-fock/3-21G level of theory, singlet spin.

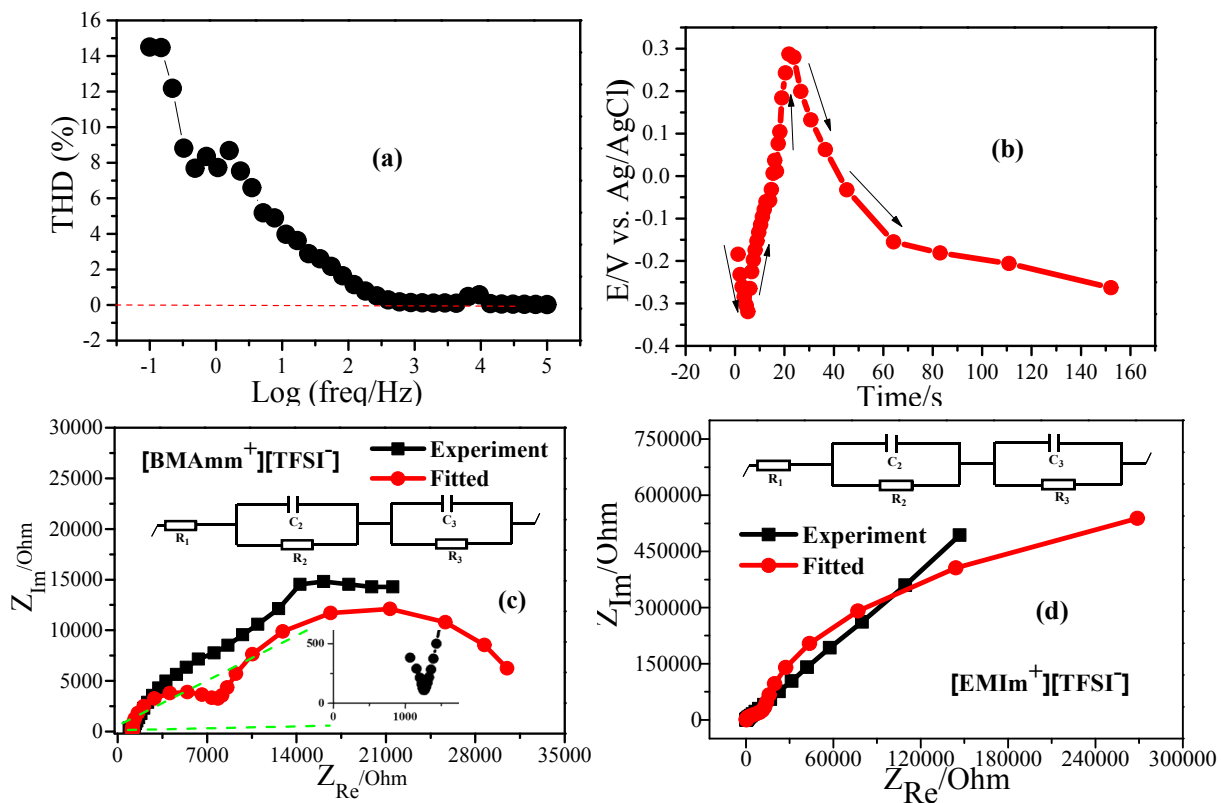

Figure S2: (a) Total harmonic distortion in [BMImm<sup>+</sup>][TFSI<sup>-</sup>] medium (b) Sinusoid of voltage flow in [BMImm<sup>+</sup>][TFSI<sup>-</sup>] medium (c) Nyquist plot of [BMImm<sup>+</sup>][TFSI<sup>-</sup>] medium (d) Nyquist plot of [EMIm<sup>+</sup>][TFSI<sup>-</sup>] medium.
